# Supplementary material for: SLPI is a critical mediator that controls PTH-induced bone formation
Source: Nat Commun. 2021 Apr 9;12:2136. doi: 10.1038/s41467-021-22402-x (PMC8035405; doi:10.1038/s41467-021-22402-x)
Supplement: Supplementary file 1 — Supplementary Information [file 41467_2021_22402_MOESM1_ESM.pdf]

## Supplementary information

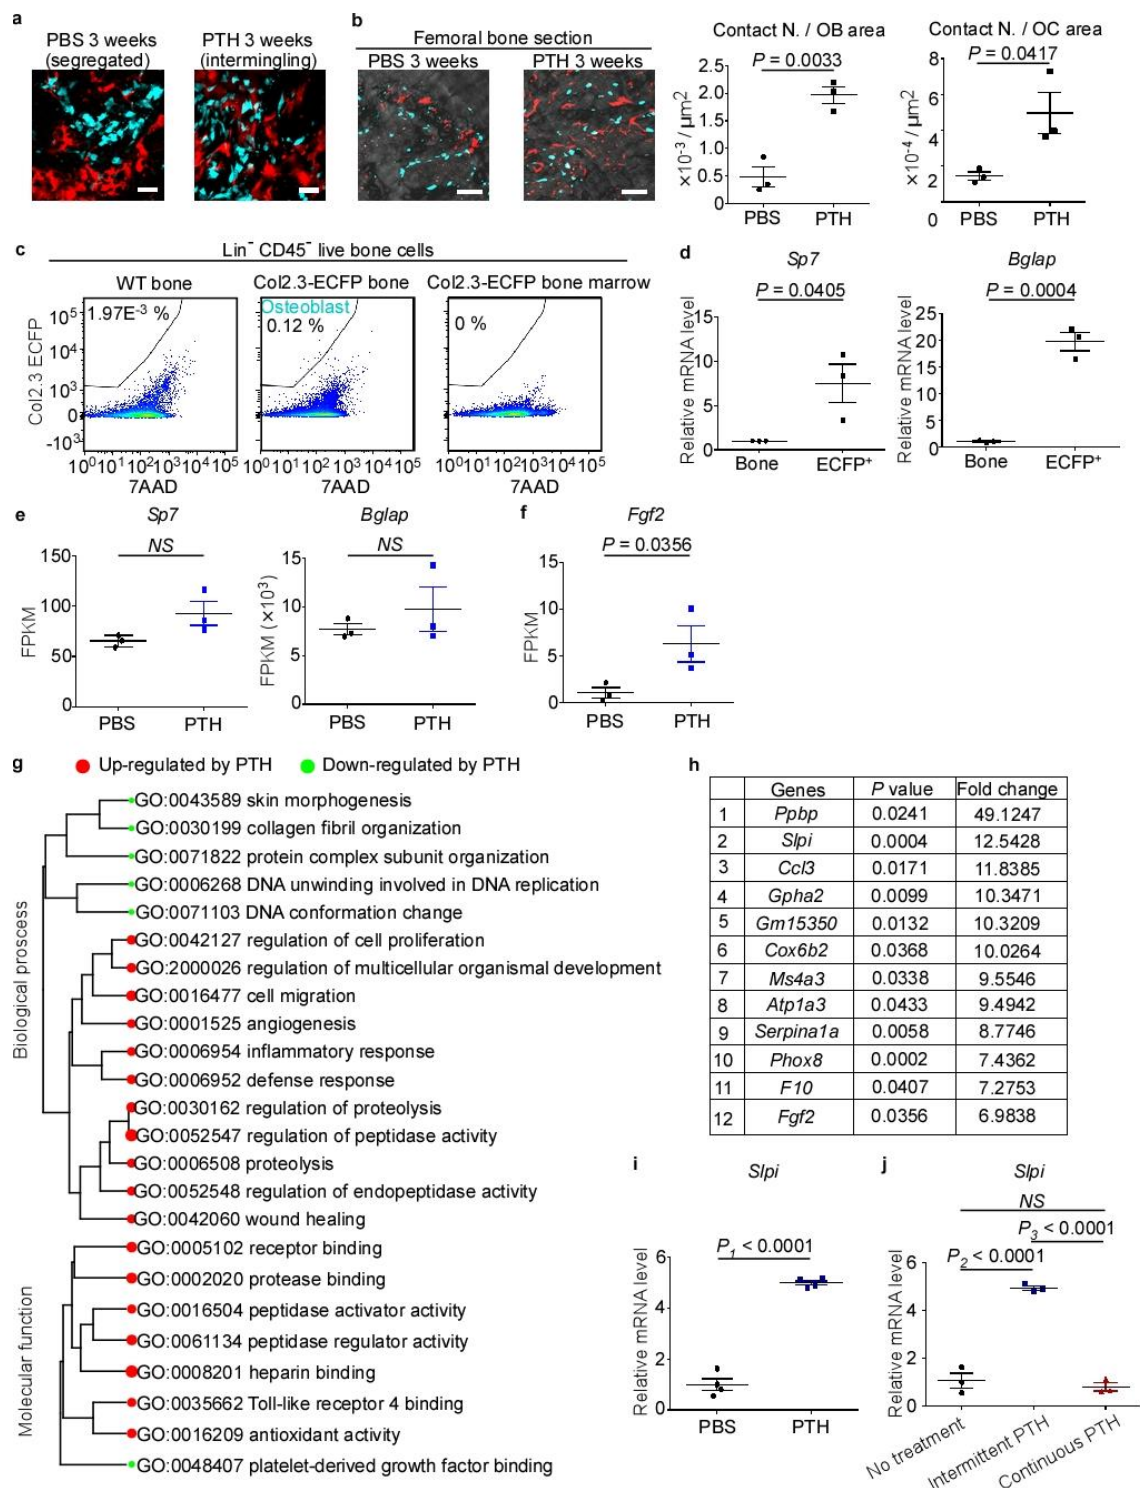

**Supplementary Figure 1. RNA-Seq-based transcriptional profiling of osteoblasts after PTH treatment.**

**a**, MIP images of skull bone tissues from Col2.3-ECFP/TRAP-tdTomato mice

under control conditions (left) and after intermittent PTH treatment for 3 weeks (right). Images were acquired by intravital multi-photon microscopy (Representative image,  $n = 3$  biologically independent experiments). Cyan, mature osteoblasts expressing Col2.3-ECFP; red, mature osteoclasts expressing TRAP-tdTomato. Scale bar, 50  $\mu\text{m}$ . **b**, Left panel shows histological analysis of a femoral metaphyseal region of Col2.3-ECFP/TRAP-tdTomato mice (Representative images,  $n = 3$  mice per group). Cyan, mature osteoblasts; red, mature osteoclasts. Scale bar, 100  $\mu\text{m}$ . Right panel shows numbers of contacts between osteoblasts and osteoclasts; data were normalized to the ECFP<sup>+</sup> osteoblasts (OB) area, and tdTomato<sup>+</sup> osteoclasts (OC) area, respectively ( $n = 3$  mice per group). **c**, FACS separation of ECFP<sup>+</sup> cells from the indicated tissues. BM, bone marrow. **d**, Gene expression profile of ECFP<sup>+</sup> cells (quantitative reverse transcription-polymerase chain reaction, qRT-PCR) ( $n = 3$  biologically independent samples per group). **e**, Expression levels of osteoblast marker genes in ECFP<sup>+</sup> cells harvested from mice treated intermittently with phosphate-buffered saline (PBS) or PTH (RNA-Seq) ( $n = 3$  biologically independent samples per group). FPKM, fragments per kilobase of exon per million reads mapped. **f**, Expression level of *Fgf2* in ECFP<sup>+</sup> cells from mice treated intermittently with PBS or PTH (RNA-Seq) ( $n = 3$  biologically independent samples per group). FPKM, fragments per kilobase of exon per million reads mapped. **g**, Enriched Gene Ontology (GO) categories of differentially expressed genes between control and intermittently PTH-treated osteoblasts (RNA-Seq). Gene sets closer on the tree share more genes. Dot size is proportional to adjusted p-value. **h**, Top 12 upregulated genes in ECFP<sup>+</sup> cells induced by PTH treatment ( $n = 3$  biologically independent samples per group). **i**, Validation that the *Slpi* gene is regulated by PTH (qRT-PCR) ( $n = 4$  biologically independent samples per group). **j**, *Slpi* expression in control (untreated) ECFP<sup>+</sup> cells or cells subjected to intermittent and continuous PTH treatment for 3 weeks (qRT-PCR) ( $n = 3$  biologically independent samples per group). Data are means  $\pm$  SEM. NS, not significant. Statistical significance was determined by two-tailed Student's t-test (**b**, **d**, **e**, **f**, **h**, **i**), and ANOVA with Tukey's test (**j**). (**i**)  $P_1$  exact value =  $3.3\text{E}^{-6}$ . (**j**)  $P_2$  exact value =  $3.2\text{E}^{-5}$ ,  $P_3$  exact value =  $2.2\text{E}^{-5}$ .

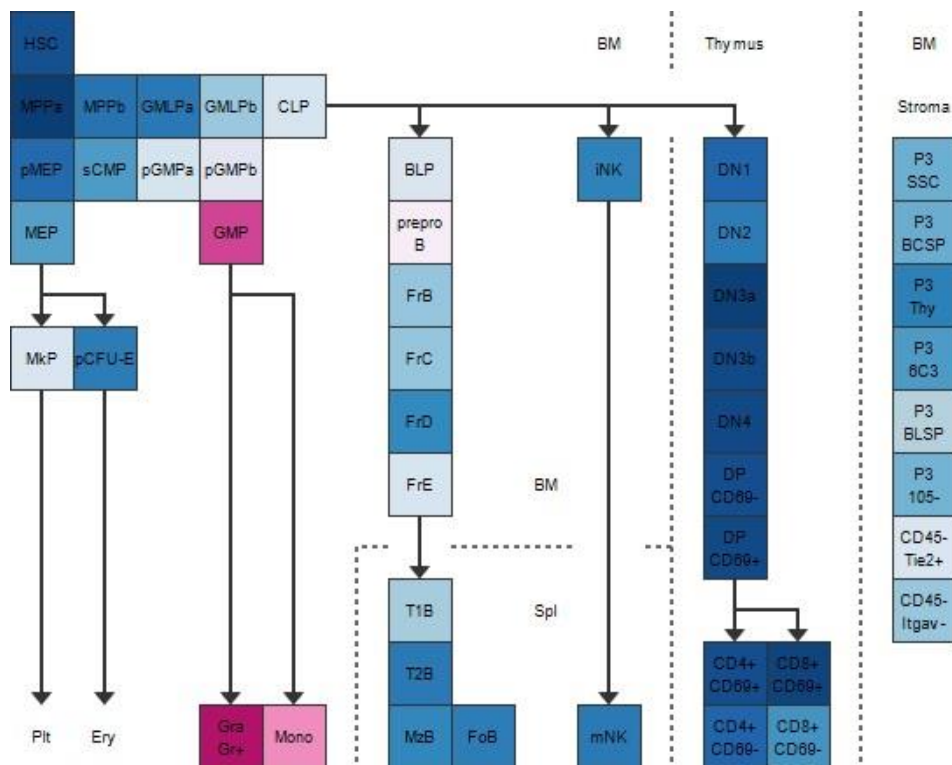

### Supplementary Figure 2. Expression of SLPI in bone marrow.

Relative expression levels of *Sipi* in hematopoietic and stromal populations in bone marrow tissue, as determined by microarray analysis. Data are accessible through the Gene Expression Commons platform (<https://gexc.riken.jp>).

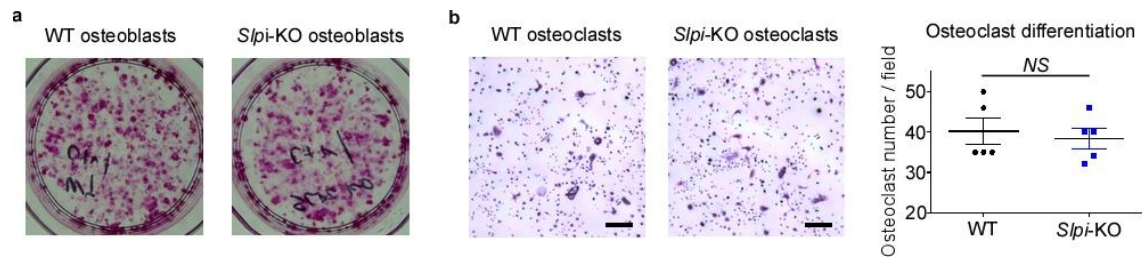

### Supplementary Figure 3. Bone phenotype of *Slpi*-KO mice.

**a**, Alizarin Red S staining of primary osteoblasts from WT and *Slpi*-KO mice. Osteoblasts were incubated in osteogenic medium for 14 days.  $\beta$ -glycerophosphate was used at a concentration of 10 mM. **b**, TRAP staining of primary osteoclasts from WT and *Slpi*-KO mice. Scale bar, 200  $\mu$ m. Right, numbers of TRAP<sup>+</sup> cells ( $n = 5$  biological replicates per group). Data are means  $\pm$  SEM. NS, not significant. Statistical significance was determined by two-tailed Student's t-test (**b**).

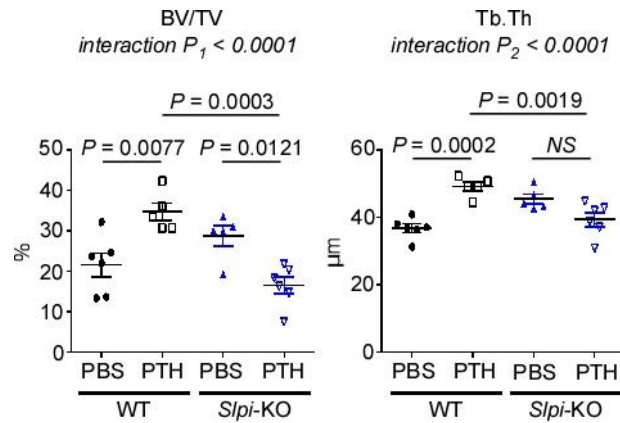

**Supplementary Figure 4. Microcomputed tomography ( $\mu$ CT) analysis of male *Sipi-KO* mice.**

Ratio of bone volume to total bone volume (BV/TV), and trabecular thickness (Tb.Th) values obtained from the secondary trabeculae of distal metaphyses in WT and *Sipi-KO* male mice treated with vehicle or intermittent PTH (WT PBS:  $n = 6$  mice, WT PTH:  $n = 5$  mice, *Sipi-KO* PBS:  $n = 5$  mice, *Sipi-KO* PTH:  $n = 6$  mice). Data are means  $\pm$  SEM. NS, not significant. Statistical significance was determined by ANOVA with Tukey's test.  $P_1$  exact value =  $7.2E^{-5}$ ,  $P_2$  exact value =  $1.6E^{-5}$ .

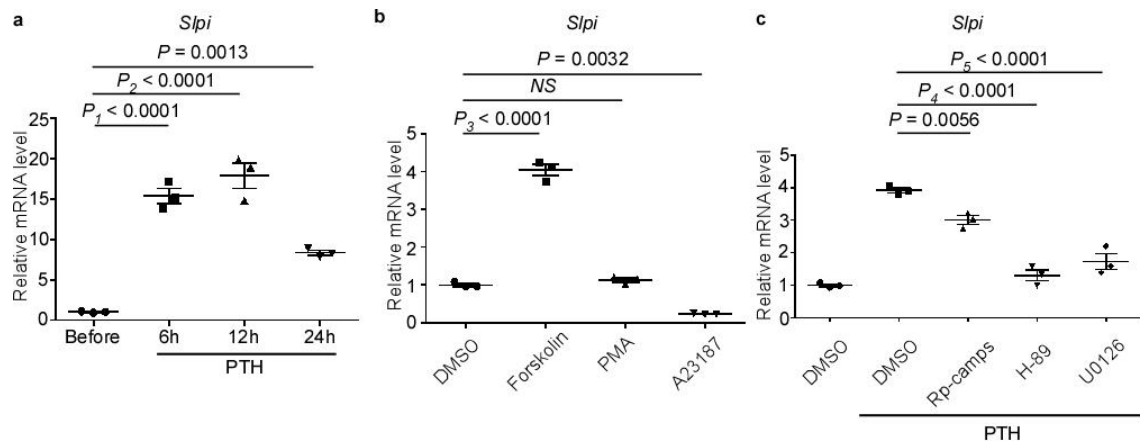

**Supplementary Figure 5. PTH regulates *Slpi* expression via protein kinase A (PKA) and Erk signaling.**

**a**, mRNA levels of *Slpi* in MC3T3-E1 cells. MC3T3-E1 cells were differentiated in osteogenic medium for 14 days and starved of serum for 12 h. The cells were stimulated with 24.3 nM PTH, and *Slpi* expression levels were evaluated before and at 6, 12, and 24 h after PTH treatment (n = 3 cells per group). **b**, *Slpi* mRNA levels in MC3T3-E1 cells. MC3T3-E1 cells were differentiated in osteogenic medium for 14 days and starved of serum for 12 h. The cells were treated with the indicated stimulators. After 6 h, the levels of *Slpi* mRNA were measured (qRT-PCR) (n = 3 cells per group). **c**, *Slpi* mRNA levels in MC3T3-E1 cells. MC3T3-E1 cells were differentiated in osteogenic medium for 14 days and starved of serum for 12 h. The cells were pretreated with H89 and Rp-cAMPS for 30 min and with U0126 for 12 h. Next, the cells were stimulated with human PTH. The levels of *Slpi* mRNA were measured after 6 h (qRT-PCR) (n = 3 cells per group). Data are means  $\pm$  SEM. NS, not significant. Statistical significance was determined by ANOVA with Dunett's test (**a**, **b**, **c**). (**a**)  $P_1$  approximate value  $< E^{-15}$ ,  $P_2$  approximate value  $< E^{-15}$ . (**b**)  $P_3$  approximate value  $< E^{-15}$ . (**c**)  $P_4$  approximate value  $< E^{-15}$ ,  $P_5$  approximate value  $< E^{-15}$ .

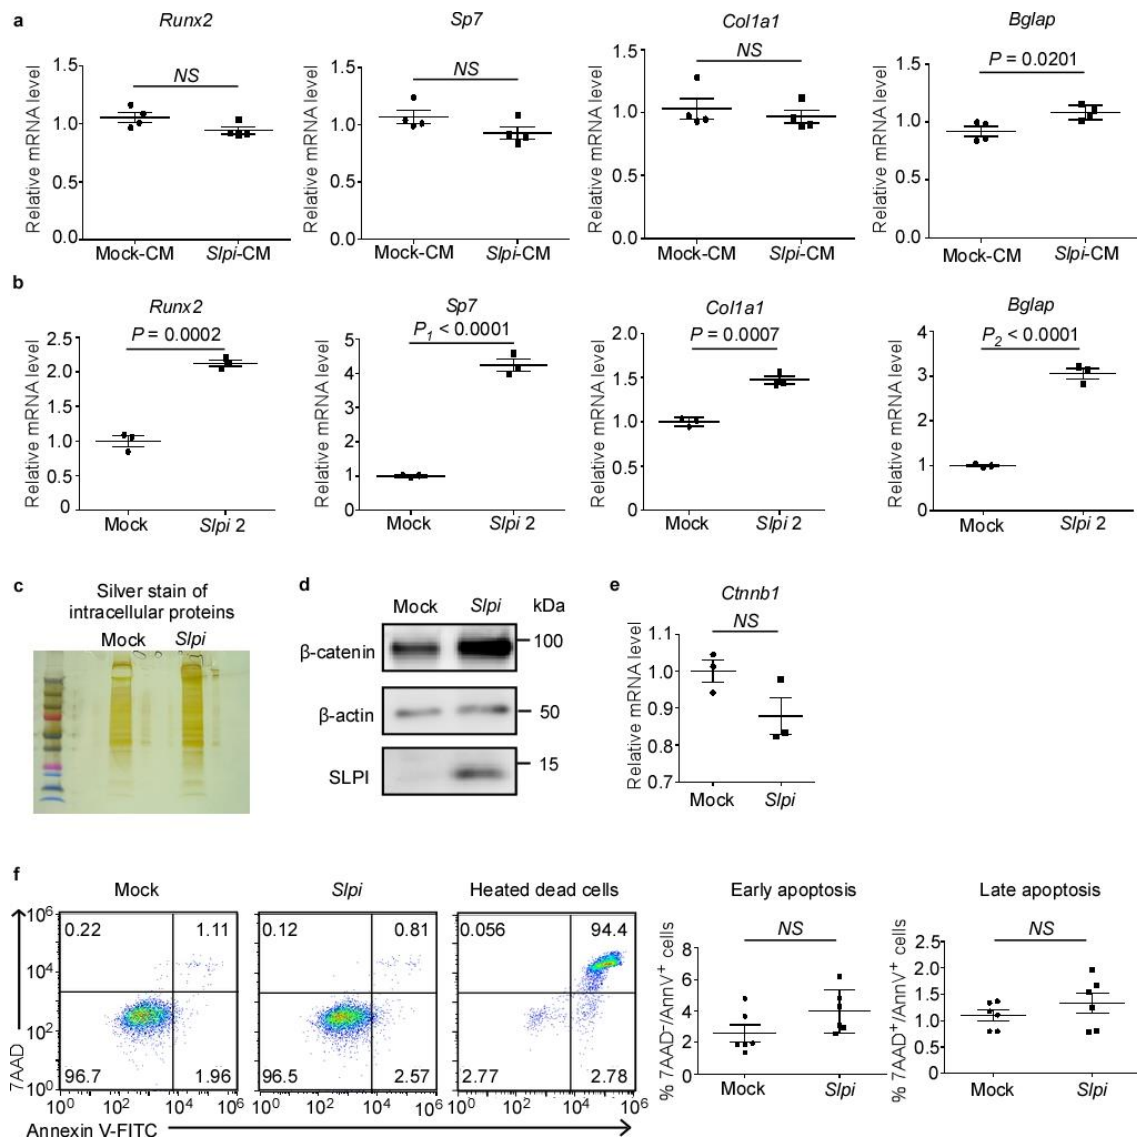

### Supplementary Figure 6. Direct effect of *Slpi* on osteoblasts.

**a**, qPCR analysis of MC3T3-E1 cells treated with *Slpi* conditioned medium under osteogenic conditions for 3 days ( $n = 3$  biological replicates per group). For the generation of conditioned medium, the supernatants from subconfluent cultures of MC3T3-E1 cells were collected and passed through a 0.45- $\mu$ m filter to eliminate cells. Supernatants were then diluted with one volume of  $\alpha$ -MEM, and used as the conditioned medium. **b**, qPCR analysis of MC3T3-E1 cells transfected with pMX-*Slpi*-puro or pMX-puro ( $n = 3$  biological replicates per group). Cells were cultured in osteogenic differentiation medium for 3 days. Subsequently, the expression levels of osteoblast transcript regulators (*Runx2*, *Sp7*) and differentiation marker genes (*Bglap*, *Col1a1*) were quantified. **c**, Silver staining of intracellular proteins from control or *Slpi*-overexpressing MC3T3-E1

cells. Total protein levels were determined by bicinchoninic acid (BCA) assay. **d**,  $\beta$ -catenin levels in MC3T3-E1 cells (Representative blot,  $n = 3$  biologically independent experiments). Control (mock) and *S/pi*-overexpressing (*S/pi*) MC3T3-E1 cells were seeded, incubated until 60% confluence, lysed, and subjected to immunoblotting analysis. **e**, mRNA levels of  $\beta$ -catenin in control and *S/pi*-overexpressing MC3T3-E1 cells ( $n = 3$  biological replicates per group). **f**, Control (mock) or *S/pi*-overexpressing MC3T3-E1 cells were examined by flow cytometry with co-staining of annexin V and 7-AAD. Heated dead cells were used as the positive control. Percentages of cells are shown. Right, percentages of apoptotic cells ( $n = 6$  biological replicates per group). Data are means  $\pm$  SEM. NS, not significant. Statistical significance was determined by two-tailed Student's t-test (**a**, **b**, **e**, **f**). (**b**)  $P_1$  exact value =  $5.7E^{-5}$ ,  $P_2$  exact value =  $6.4E^{-5}$ .

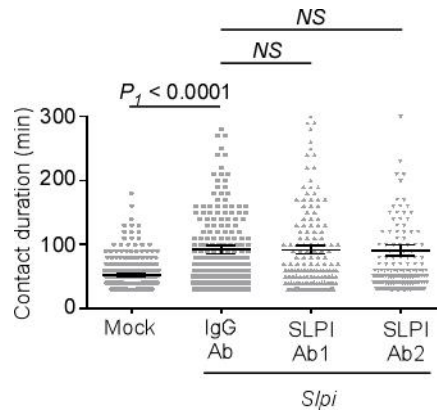

**Supplementary Figure 7. Effects of SLPI antibodies on colocalization of osteoblasts and osteoclasts induced by SLPI.**

Mock or *Slpi*-overexpressing MC3T3-E1-EGFP cells were cocultured with tdTomato<sup>+</sup> primary osteoclasts (Mock: n = 267 cells examined over 6 independent experiments, *Slpi* IgG Ab: n = 274 cells examined over 6 independent experiments, *Slpi* SLPI Ab1: n = 167 cells examined over 5 independent experiments, *Slpi* SLPI Ab2: n = 158 cells examined over 5 independent experiments). The contact duration was analyzed in the absence or presence of two commercially available SLPI neutralizing antibodies. Data are means  $\pm$  SEM. NS, not significant. Statistical significance was determined by ANOVA with Tukey's test.  $P_1$  exact value =  $2.4E^{-7}$ .

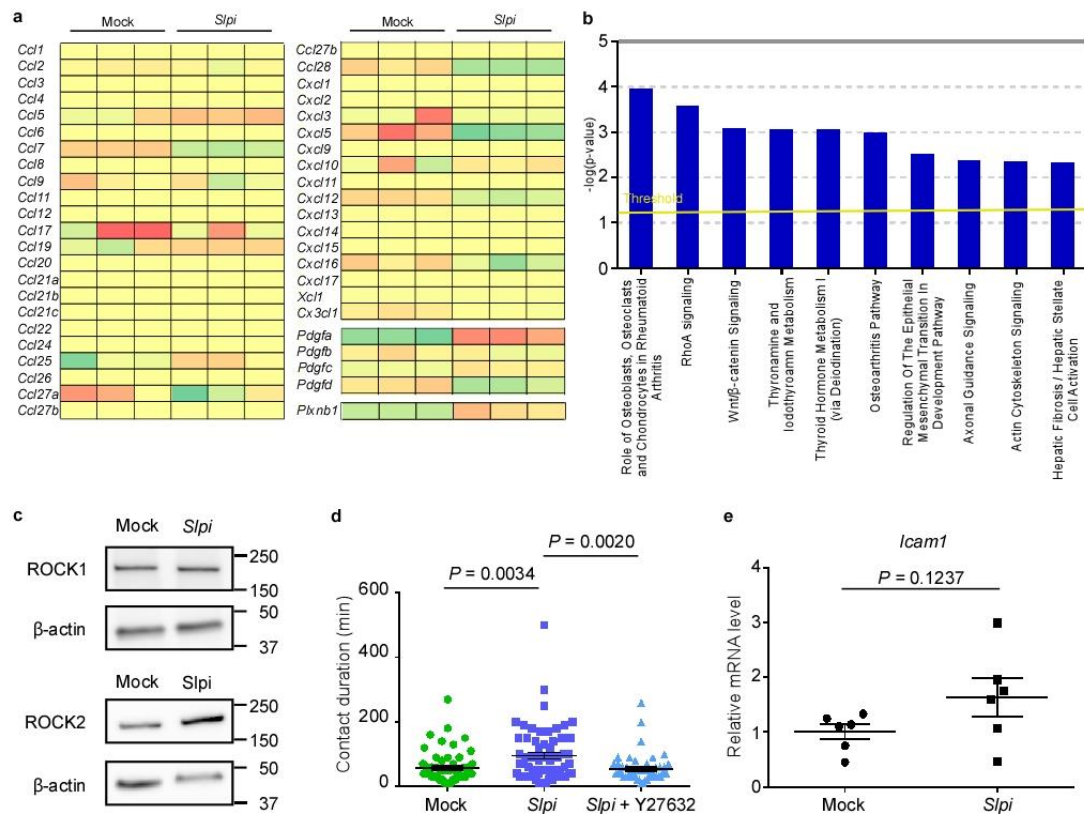

**Supplementary Figure 8. Mechanistic insight of osteoblast-osteoclast colocalization via SLPI.**

**a**, RNAseq data representing chemokines, growth factors, and an axon guidance molecule: green, downregulation; red, upregulation (n = 3 biological replicates per group). **b**, List of canonical pathways affected by SLPI based on RNA-sequencing of mock and *Slpi*-overexpressing MC3T3-E1 cells (n = 3 biological replicates per group). Top 10 categories are shown. Data were calculated using Ingenuity Pathway Analysis (IPA). Genes associated with RhoA signaling, and Wnt/β-catenin signaling were highly-ranked in the *Slpi*-overexpressing cells. **c**, Immunoblotting analysis of ROCK proteins in MC3T3-E1 cells (Representative blot, n = 2 biologically independent experiments). **d**, Effects of ROCK inhibitor Y27632 on the colocalization of osteoblasts and osteoclasts (Mock: n = 56 cells examined over 5 independent experiments, *Slpi*: n = 64 cells examined over 5 independent experiments, *Slpi* + Y27632: n = 50 cells examined over 5 independent experiments). Mock or *Slpi*-overexpressing MC3T3-E1-EGFP cells were cocultured with tdTomato<sup>+</sup> primary osteoclasts. **e**, *Icam1* mRNA expression levels in MC3T3-E1 cells (n = 6 biological replicates per group). Data are means ± SEM. Statistical significance was determined by ANOVA with Tukey's test (**d**), and two-tailed Student's t-test (**e**).

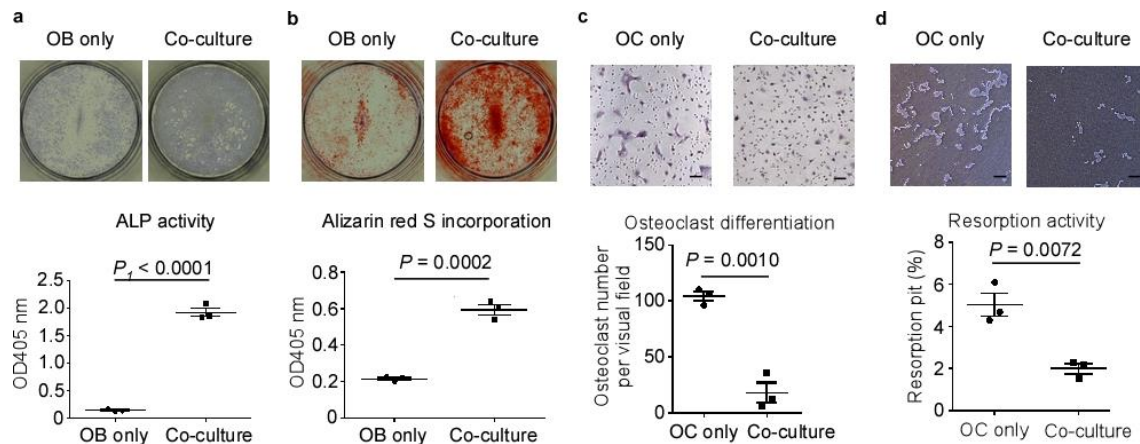

### Supplementary Figure 9. Consequences of osteoblast and osteoclast colocalization.

**a, b**, Representative images of adult primary bone marrow osteoblasts in the presence or absence of primary osteoclasts, assessed by alkaline phosphatase (ALP) staining (**a**) and Alizarin Red S staining (**b**).  $\beta$ -glycerophosphate was used at a concentration of 10 mM. After 14 days of differentiation, quantification of ALP activity and Alizarin Red S was measured ( $n = 3$  biological replicates). **c**, Representative images of primary osteoclasts in the presence or absence of MC3T3-E1 cells, assessed by TRAP staining. TRAP<sup>+</sup> multinuclear cells were considered mature osteoclasts ( $n = 3$  biological replicates). Scale bar, 100  $\mu$ m. **d**, Effects of the presence of MC3T3-E1 cells on the generation of bone resorption pits. Mature osteoclasts were transferred to a Corning Osteoassay Surface in the presence or absence of differentiated MC3T3-E1 cells. After 48 h, resorption pits were visualized. Scale bar, 100  $\mu$ m. Lower panel, area of resorption pits (%) ( $n = 3$  biological replicates per group). Data are means  $\pm$  SEM. NS, not significant. Statistical significance was determined by two-tailed Student's t-test (**a, b, c, d**). (**a**)  $P_1$  exact value =  $2.1 \times 10^{-5}$ .

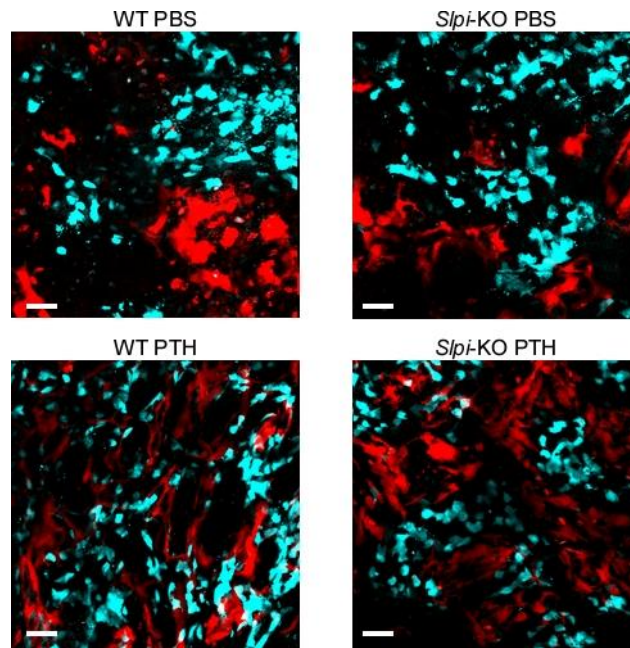

**Supplementary Figure 10. Magnified view of tiling images.**

Magnified view of tiling maximum-intensity projection (MIP) images of skull tissues obtained by intravital microscopy, as shown in **Fig. 4a**. Left panel, tiling image of Col2.3-ECFP/TRAP-tdTomato/*Sipi*<sup>WT/WT</sup> mice; right panel, image of Col2.3-ECFP/TRAP-tdTomato/*Sipi*<sup>KO/KO</sup> mice at 3 weeks after intermittent PBS (upper panel) or PTH (lower panel) treatment (Representative image,  $n = 6$  biologically independent experiments). Cyan, mature osteoblasts; red, mature osteoclasts. Scale bars, 50  $\mu\text{m}$ .

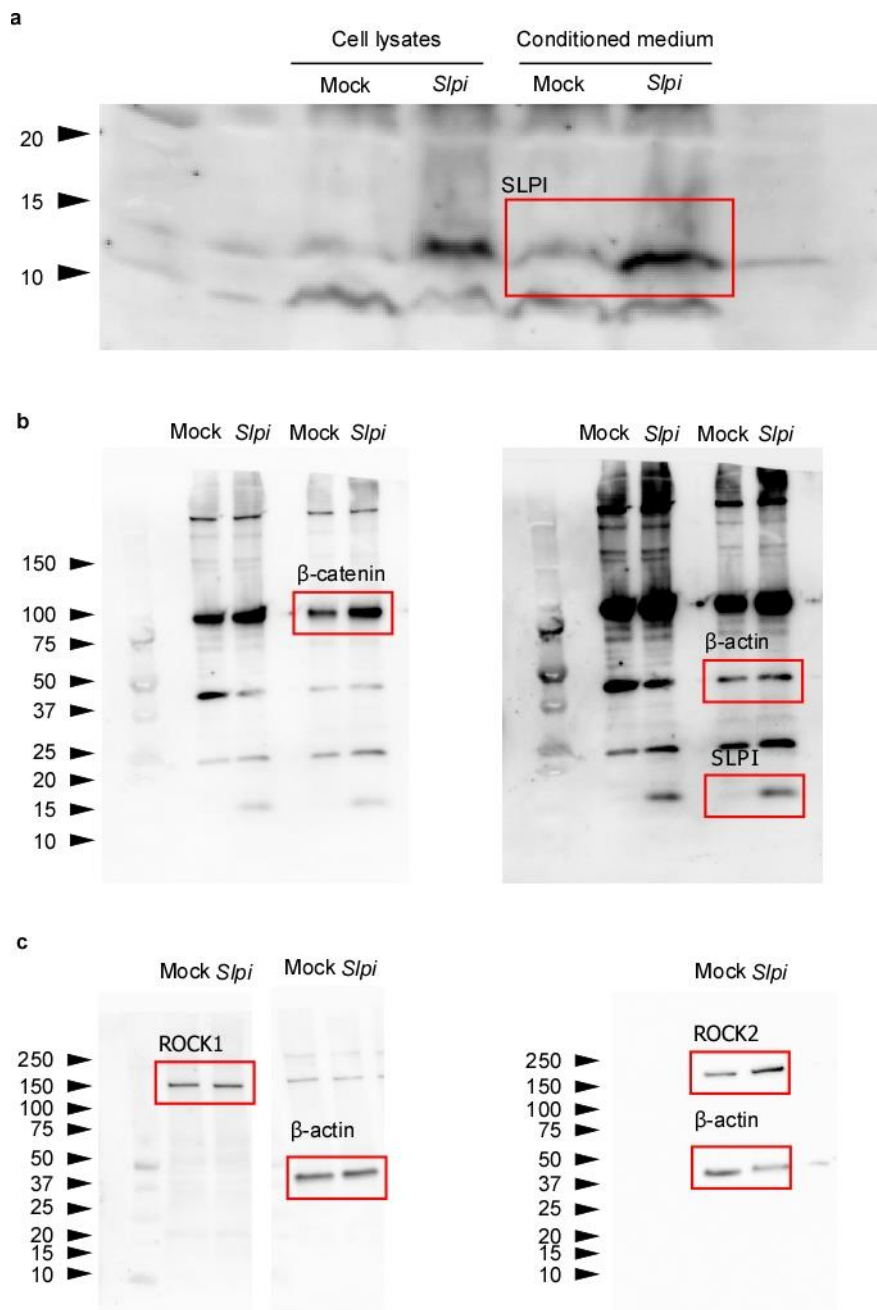

**Supplementary Figure 11. Source figures for immunoblotting analysis.**

**a**, Source figure for **Fig. 2b**. **b**, Source figure for **Supplementary Fig. 6d**. **c**, Source figure for **Supplementary Fig. 8c**.

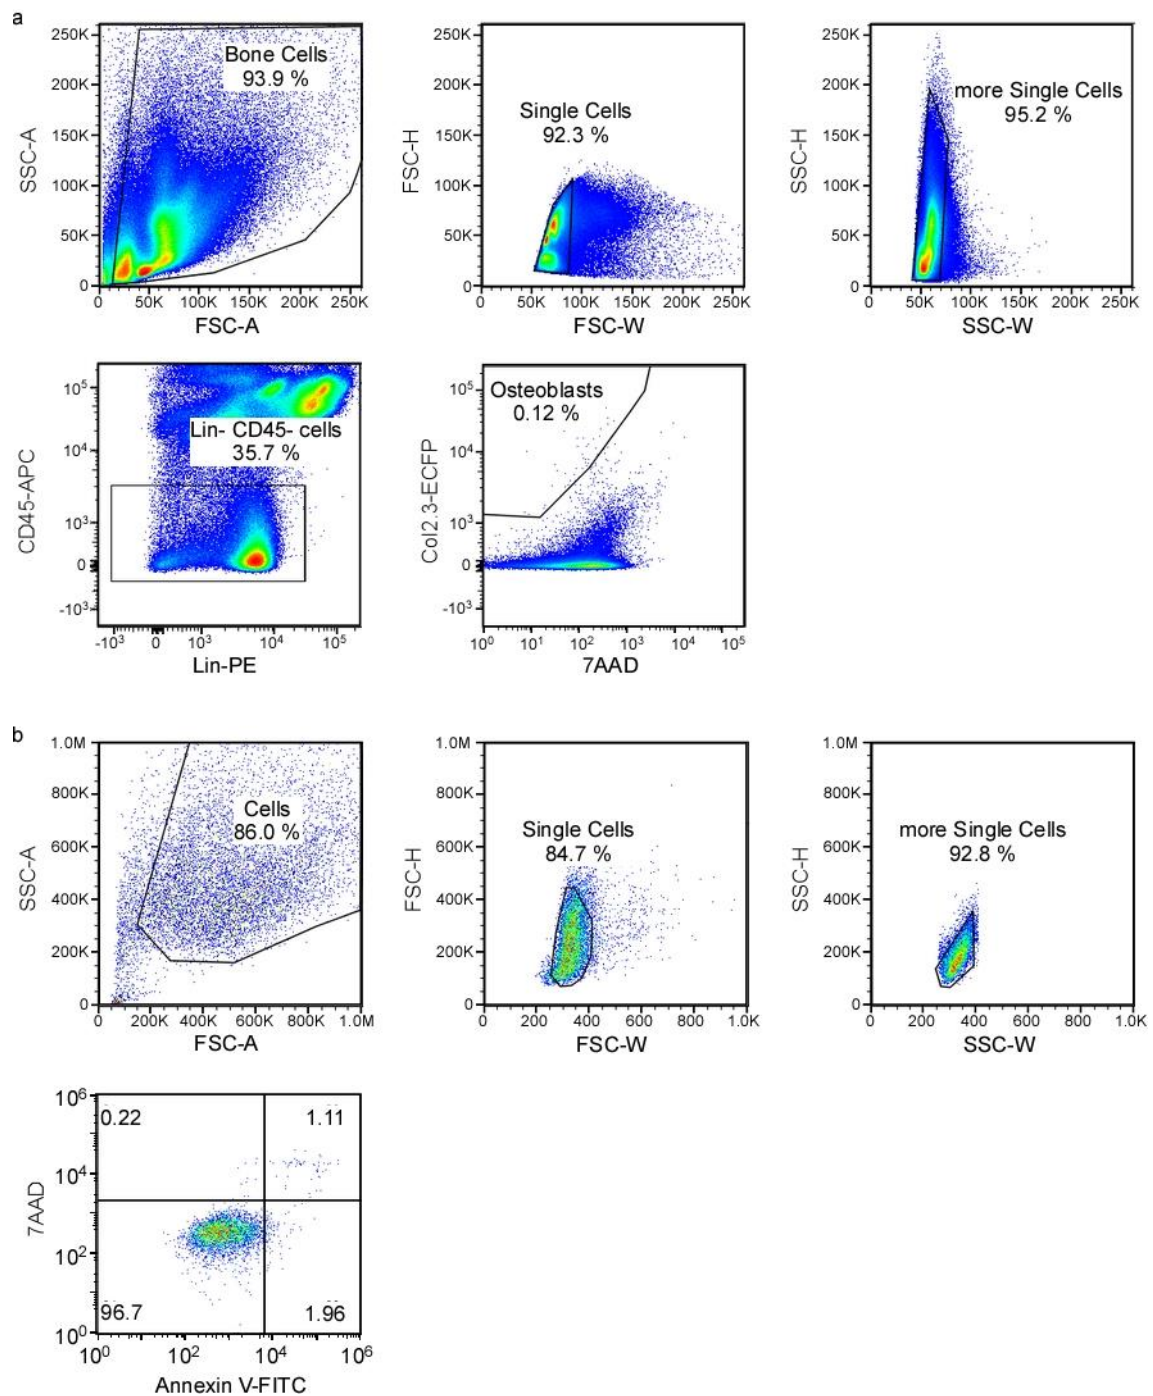

**Supplementary Figure 12. FACS gating strategy**

**a**, Gating strategies for ECFP<sup>+</sup> osteoblasts (**Supplementary Fig. 1c**). **b**, Gating strategies for the evaluation of apoptotic MC3T3-E1 cells (**Supplementary Fig. 6f**).

| Twelve-week-old female mice with intermittent vehicle or PTH for 4 weeks |                            |                        |                                            |                                     |                      |                                      |                                                      |
|--------------------------------------------------------------------------|----------------------------|------------------------|--------------------------------------------|-------------------------------------|----------------------|--------------------------------------|------------------------------------------------------|
| Parameters                                                               | WT Vehicle<br>(N = 6 mice) | WT PTH<br>(N = 5 mice) | <i>Sipi</i> -KO<br>Vehicle<br>(N = 6 mice) | <i>Sipi</i> -KO PTH<br>(N = 5 mice) | ANOVA                |                                      |                                                      |
|                                                                          |                            |                        |                                            |                                     | WT Vehicle<br>vs PTH | <i>Sipi</i> -KO<br>Vehicle vs<br>PTH | Interaction<br>between<br><i>Sipi</i> -KO and<br>PTH |
| BV/TV (%)                                                                | 7.3 ± 0.697                | 10.7 ± 1.301           | 5.80 ± 0.771                               | 6.11 ± 0.187                        | p = 0.0251*          | p = 0.9506                           | p = 0.0962                                           |
| Tb.Th (µm)                                                               | 33.5 ± 1.70                | 39.7 ± 1.27            | 31.6 ± 2.45                                | 31.3 ± 0.335                        | p = 0.0427*          | p = 0.9954                           | p = 0.0823                                           |
| Tb.N (/mm)                                                               | 2.20 ± 0.115               | 2.68 ± 0.319           | 1.79 ± 0.111                               | 1.95 ± 0.072                        | p = 0.1228           | p = 0.7689                           | p = 0.3627                                           |
| Tb.Sp (µm)                                                               | 426 ± 25                   | 356 ± 49               | 537 ± 40                                   | 483 ± 18                            | p = 0.3130           | p = 0.4917                           | p = 0.8191                                           |
| MAR (µm/day)                                                             | 1.66 ± 0.231               | 2.59 ± 0.123           | 1.59 ± 0.221                               | 1.81 ± 0.191                        | p = 0.0220*          | p = 0.8718                           | p = 0.0977                                           |
| MS/BS (%)                                                                | 26.1 ± 1.83                | 37.9 ± 3.30            | 30.4 ± 1.86                                | 34.5 ± 3.02                         | p = 0.0173*          | p = 0.6506                           | p = 0.1421                                           |
| BFR / BS<br>(µm <sup>3</sup> /µm <sup>2</sup> /day)                      | 0.161 ±<br>0.067           | 0.361 ± 0.096          | 0.170 ±<br>0.038                           | 0.230 ± 0.083                       | p = 0.0002***        | p = 0.1899                           | p = 0.0366*                                          |
| Ob.S/BS (%)                                                              | 12.6 ± 4.98                | 19.0 ± 4.90            | 8.38 ± 1.95                                | 15.6 ± 1.67                         | p = 0.0564           | p = 0.0366*                          | p = 0.8098                                           |
| OS/BS (%)                                                                | 12.5 ± 1.38                | 27.5 ± 4.56            | 7.31 ± 1.98                                | 18.9 ± 7.12                         | p = 0.0340*          | p = 0.1123                           | p = 0.6767                                           |
| OV/BV (%)                                                                | 2.28 ± 0.546               | 5.46 ± 0.295           | 1.53 ± 0.454                               | 2.59 ± 1.44                         | p = 0.0319*          | p = 0.5916                           | p = 0.2089                                           |
| O.Th (µm)                                                                | 2.08 ± 0.343               | 2.66 ± 0.154           | 1.34 ± 0.362                               | 1.65 ± 0.467                        | p = 0.4352           | p = 0.7848                           | p = 0.6103                                           |
| Oc.S/BS (%)                                                              | 4.52 ± 0.462               | 5.80 ± 0.795           | 6.39 ± 0.904                               | 5.64 ± 1.03                         | p = 0.5401           | p = 0.9940                           | p = 0.5343                                           |
| ES/BS (%)                                                                | 9.8 ± 0.87                 | 10.1 ± 1.31            | 12.9 ± 1.68                                | 12.5 ± 1.31                         | p = 0.9837           | p = 0.9497                           | p = 0.9244                                           |

**Supplementary Table 1. Bone histomorphometric analysis of toluidine blue-stained tibial proximal metaphyses from wild-type or *Sipi*-KO mice after PTH treatment.**

BFR/BS, bone formation rate per bone surface; BV/TV, bone volume per total volume; ES/BS, eroded surface per bone surface; MAR, mineral apposition rate; MS/BS, mineralizing surface per bone surface; O.Th, osteoid thickness; OS/BS, osteoid surface per bone surface; OV/BV, osteoid volume per bone volume;

Ob.S/BS, osteoblast surface per bone surface; Oc.S/BS, osteoclast surface per bone surface; PTH, parathyroid hormone; Slpi-KO, secretory leukocyte protease inhibitor knockout; Tb.N, trabecular number; Tb.Sp, trabecular separation; Tb.Th, trabecular thickness; WT, wild-type.

Data are mean  $\pm$  SEM. \*,  $p < 0.05$ , \*\*,  $p < 0.01$ . Statistical significance was determined by ANOVA with Šidák's test.

| Gene          | Forward                | Reverse                    |
|---------------|------------------------|----------------------------|
| <i>Slpi</i>   | CAAACCAGTGTGGAGGAAGC   | GAGCAGGGAAGTAGTTTCCAG      |
| <i>Runx2</i>  | CGACAGTCCCAACTTCCTGT   | CGGTAACCACAGTCCCATCT       |
| <i>Sp7</i>    | CATCTGCCTGACTCCTTGGGAC | GCTGAAAGGTCAGCGTATGGC      |
| <i>Col1a1</i> | TGGTTCTCCTGGTTCTCCTG   | GCTGAAGTCATAACCGCCAC       |
| <i>Bglap</i>  | GGGCAATAAGGTAGTGAACAG  | GCAGCACAGGTCCTAAATAGT      |
| <i>Fgf2</i>   | GGCTGCTGGCTTCTAAGTGT   | CCGTTTTGGATCCGAGTTTA       |
| <i>Ctnnb1</i> | CTGCTCATCCCACTAATGTC   | CTTTATTAATACTACCACCTGGTCCT |
| <i>Icam1</i>  | CAATTTCTCATGCCGCACAG   | AGCTGGAAGATCGAAAGTCCG      |
| <i>Gapdh</i>  | ACCACAGTCCATGCCATCAC   | TCCACCACCCTGTTGCTGTA       |

**Supplementary Table 2. Primers used for qPCR analyses are listed along with the corresponding gene.** Secretory leukocyte protease inhibitor (*Slpi*), runt-related transcription factor 2 (*Runx2*), Sp7 transcription factor (*Sp7*), collagen, type I, alpha 1 (*Col1a1*), bone gamma carboxyglutamate protein (*Bglap*), Fibroblast growth factor 2 (*Fgf2*), catenin (cadherin associated protein), beta 1 (*Ctnnb1*), intercellular adhesion molecule 1 (*Icam1*), glyceraldehyde-3-phosphate dehydrogenase (*Gapdh*).
